# Supplementary material for: Preparation, Characterization and Adsorption Potential of Grainy Halloysite-CNT Composites for Anthracene Removal from Aqueous Solution
Source: PubMed Central journal article supplement (PMC6630252; doi:10.3390/nano9060890), 2019-06-17
Supplement: nanomaterials-09-00890-s001.pdf [file nanomaterials-09-00890-s001.pdf]

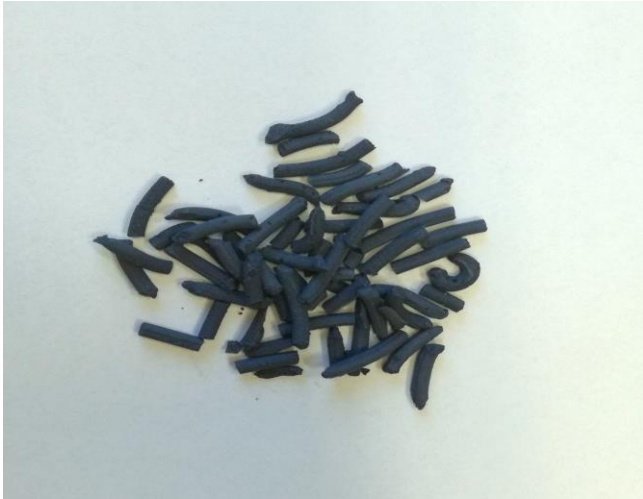

Figure S1. Digital photograph of Hal-SWCNT 85 15

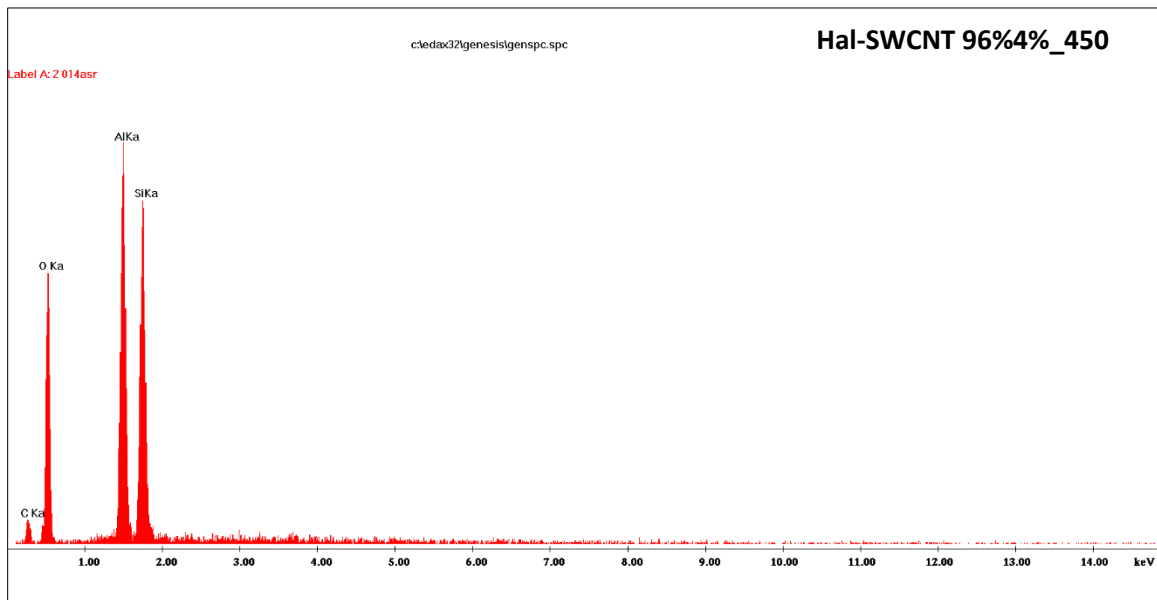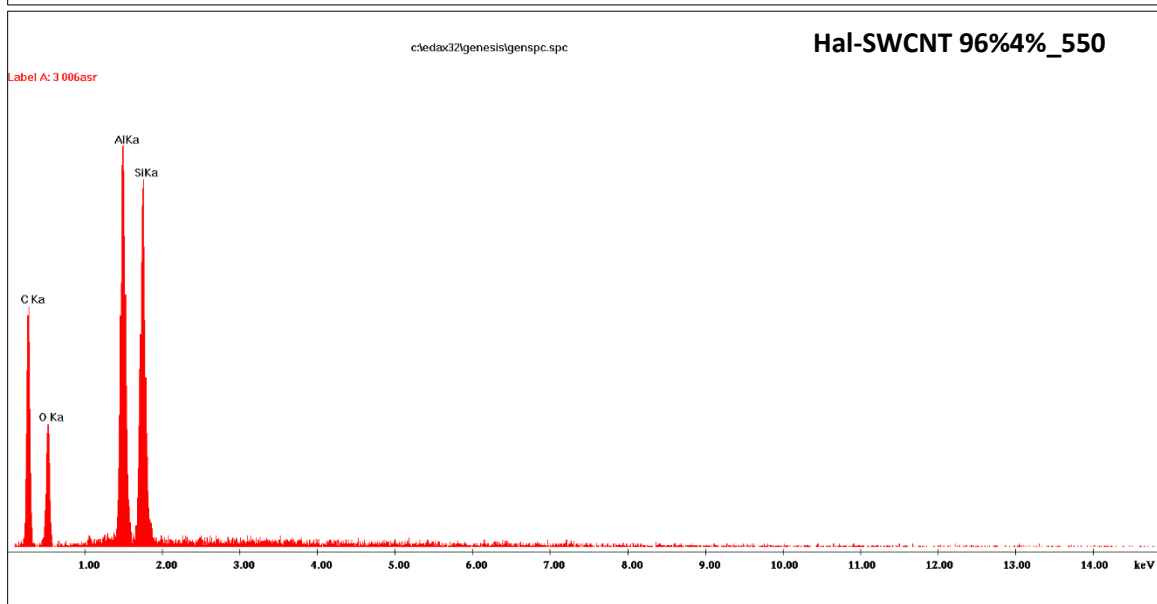

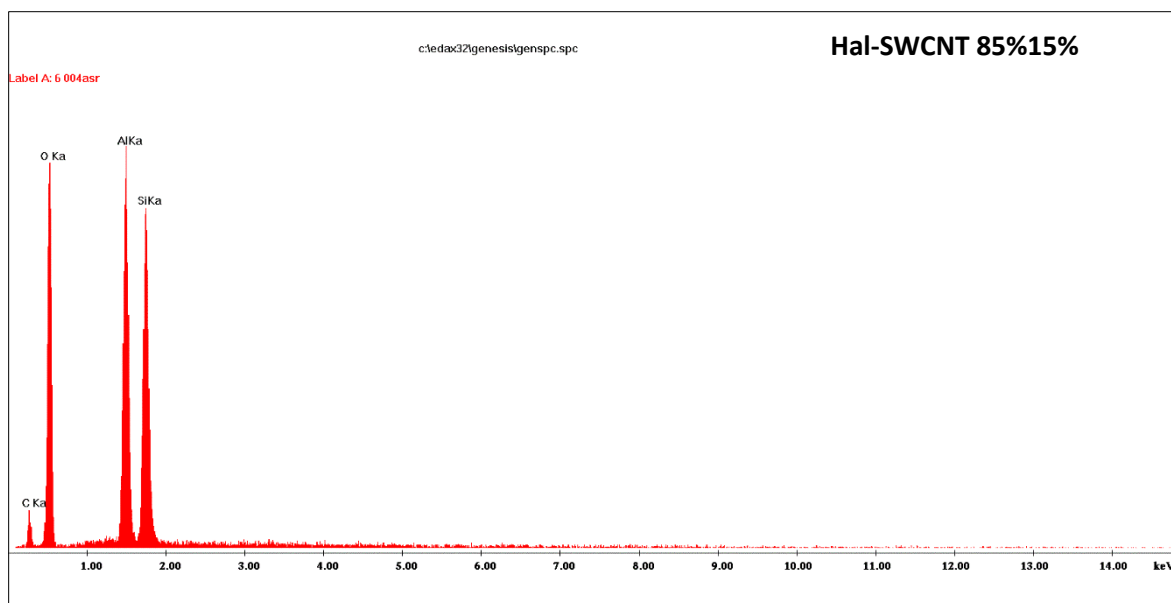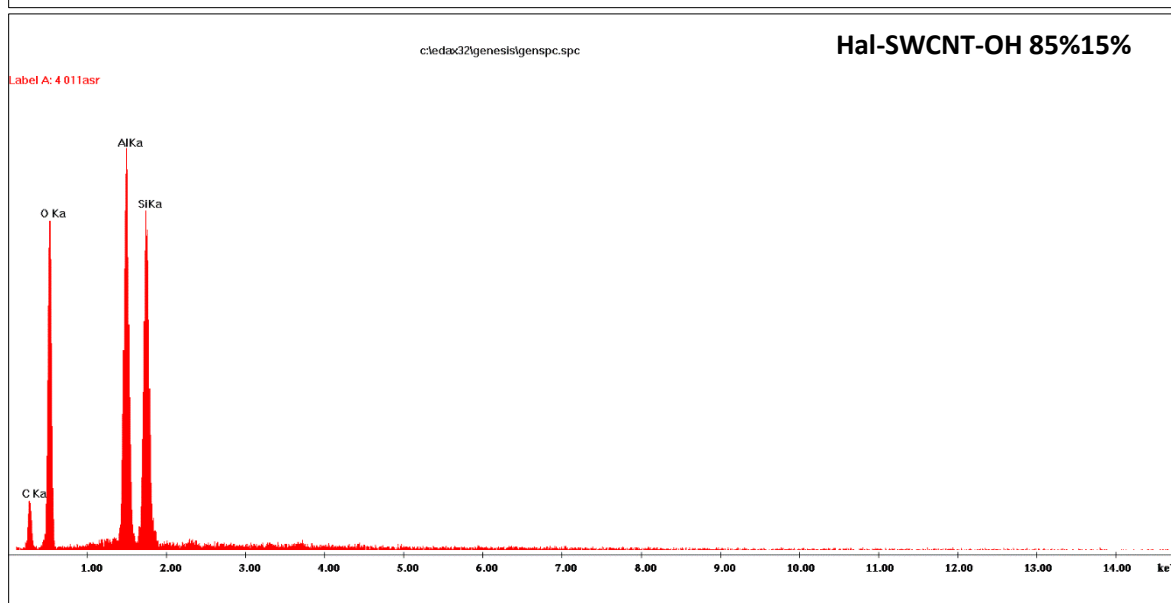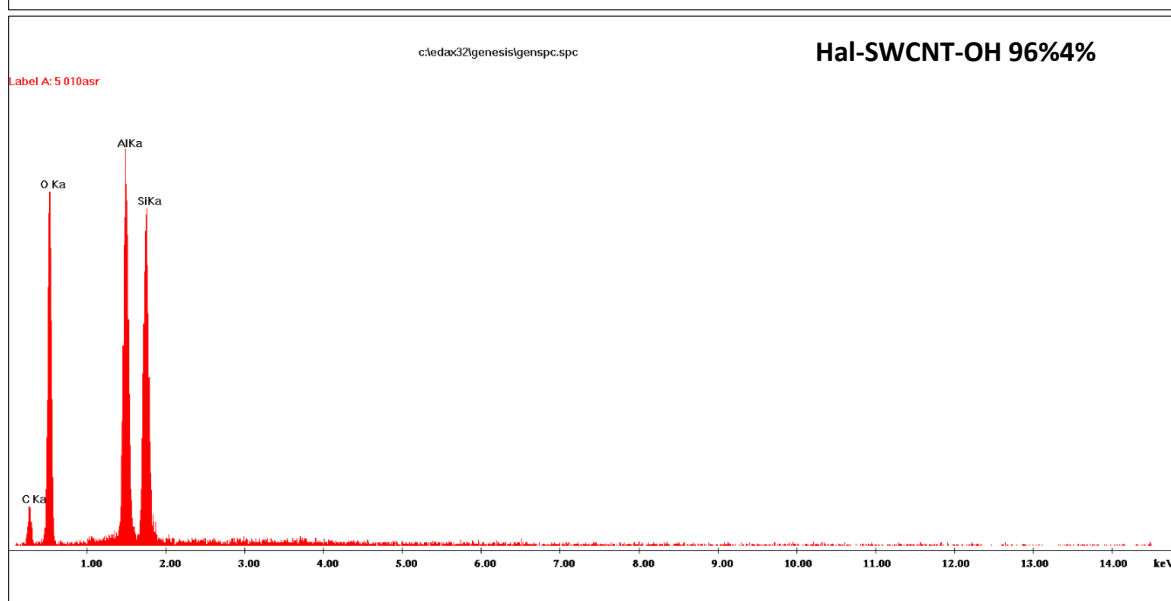

Figure S2. EDX results of Hal-CNT composites

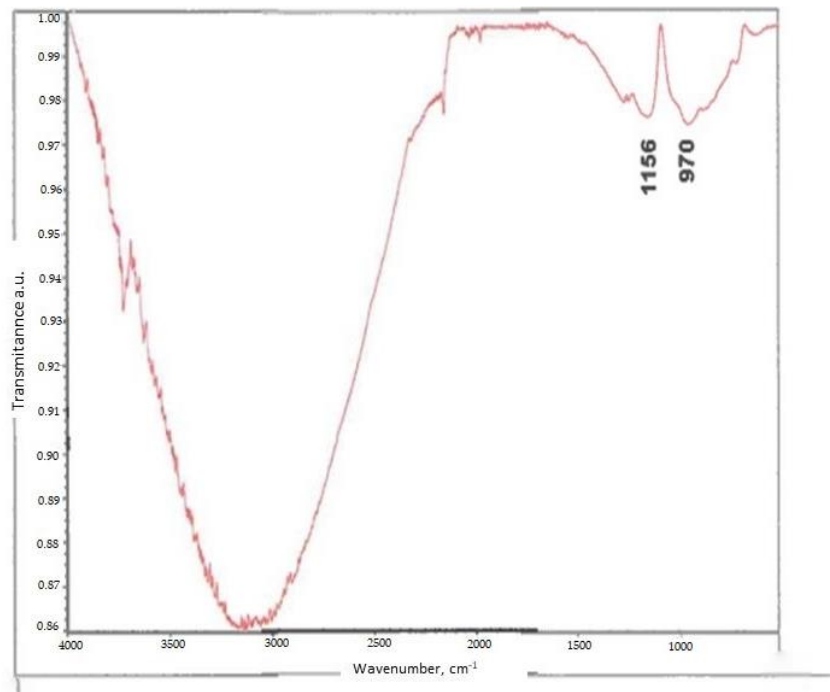

a)  
**Figure S3.** ATR-FTIR spectra of: a) SWCNT b) SWCNT-OH.

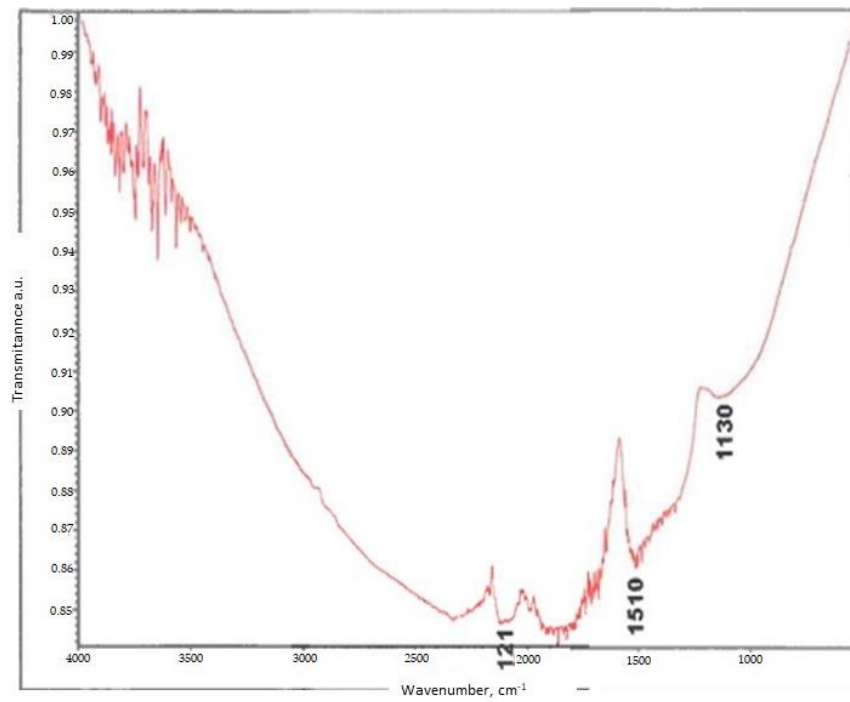

b)
